# Supplementary material for: Structural Basis of BRCC36 Function in DNA Repair and Immune Regulation
Source: PubMed Central journal article supplement — Mol Cell. 2019 Aug 8;75(3):483–497.e9. doi: 10.1016/j.molcel.2019.06.002 (PMC6695476; doi:10.1016/j.molcel.2019.06.002), 2019-08-08
Supplement: mmc1.pdf [file mmc1.pdf]

## Supplemental Information

### **Structural Basis of BRCC36 Function in DNA Repair and Immune Regulation**

**Julius Rabl, Richard D. Bunker, Andreas D. Schenk, Simone Cavadini, Mark E. Gill, Wassim Abdulrahman, Amparo Andrés-Pons, Martijn S. Luijsterburg, Adel F.M. Ibrahim, Emma Branigan, Jacob D. Aguirre, Aimee H. Marceau, Claire Guérillon, Tewis Bouwmeester, Ulrich Hassiepen, Antoine H.F.M. Peters, Martin Renatus, Laurent Gelman, Seth M. Rubin, Niels Mailand, Haico van Attikum, Ronald T. Hay, and Nicolas H. Thomä**

**A**

| protein | alternative names                                               | entrez | length | Da     |
|---------|-----------------------------------------------------------------|--------|--------|--------|
| ABRAXAS | ABRA1, ABRX1, CCDC98, FAM175A                                   | 84142  | 409    | 46663  |
| ABRO1   | ABRX2, KIAA0157, FAM175B                                        | 23172  | 415    | 46901  |
| BRCA1   | BRCAI, BRCC1, BROVCA1, IRIS, FANCS, PNCA4, PPP1R53, PSCP, RNF53 | 672    | 1863   | 207721 |
| BRCC36  | BRCC3, C6.1A, CXorf53                                           | 79184  | 316    | 36072  |
| BRE     | BABAM2, BRCC4, BRCC45                                           | 9577   | 383    | 43552  |
| MERIT40 | BABAM1, C19orf62, HSPC142, NBA1                                 | 29086  | 329    | 36560  |
| RAP80   | UIMC1, RXRIP110, X2HRIP110                                      | 51720  | 719    | 79727  |
| SHMT2   | GLY A+, GLYA, GLYM, HEL-S-51e                                   | 6472   | 504    | 55993  |

**B**

```

SP|Q6UWZ7|ABRX1_HUMAN MEGESTSAVLGSGFVLGALAFQHLNTDSDTEGFLGGEVKGAKNSITDSQMDDEVVYITD 60
SP|Q15018|ABRX2_HUMAN ----MAASISGYTFSVAVCFHSANSADHEGFLGGEVQEEFTSISDSQISNTEFLQVIE 55
      :* :*: :*: :*: :*: :*: :*: :*: :*: :*: :*: :*: :*: :*: :*: :*: :*: :*: :*: :*: :*

SP|Q6UWZ7|ABRX1_HUMAN IQKYI PCYQLFSFVNSGSEVQALKKILSNVKKINVGWYFRHRSDQIMTFRERLLHKN 120
SP|Q15018|ABRX2_HUMAN IHHHQPCSKLFSFYDYASKVNEESLDRLTKDRKRVIGWYFRFRNTQQQMSYREQV LHKQ 115
      * : : * : : * : : * : : * : : * : : * : : * : : * : : * : : * : : * : : * : : * : : *

SP|Q6UWZ7|ABRX1_HUMAN LQEHFSNODLVFLLTPSIIITESCSTRLEHSLYKPKGLFHRVPLVYANLGMSEQLGYK 180
SP|Q15018|ABRX2_HUMAN LTRILGWPDLVFLF--FISTANSTHALEYVLFRRPNRYRQZSLAIPNLGNTSQQEVK 174
      * . . . * : : * : : * : : * : : * : : * : : * : : * : : * : : * : : * : : * : : *

SP|Q6UWZ7|ABRX1_HUMAN TVSGSCMSTGFSRAVQTHSSKFFEEEDGSLKEVHKINENYASLQELKSIKCKVEDSEQAV 240
SP|Q15018|ABRX2_HUMAN VSSVPNTSQSYAKVIEHGTDFDFDKDGVKDIRAIQVYNALQEKVQAVCAOVESKERVV 234
      . * . . . : : : : : * : : : : * : : : : * : : : : * : : : : * : : : : * : : : : *

SP|Q6UWZ7|ABRX1_HUMAN DKLVKDVNRLKRETEKRRGAQIQAREKNIQKDP--QENIFLQALRTFFPNSEFLHSCVM 299
SP|Q15018|ABRX2_HUMAN ESCQAEVNKLRRIQTKRNEKEQERLQAVLSRQMPSESLDPAFSPRMPSSGFAAEGRS 294
      . : : * : : * : : * : : * : : * : : * : : * : : * : : * : : * : : * : : *

SP|Q6UWZ7|ABRX1_HUMAN SLKNRHSKSSCHVNHLDVVDNLTLMVEHTDIPASPASTPQITKHKALD--LDRWQFK 358
SP|Q15018|ABRX2_HUMAN TLGDAEASDPPPPYDFHPNQEES--TLSHSRMERSVFNRPQAVGSSNYASTSAGLKYP 352
      * : : . . * . * . . . : : : : : : : : : : : : : : : : : : : : : : : : : : : :

SP|Q6UWZ7|ABRX1_HUMAN RSRLLDQDKRSKADTGSSNQD-----KASKMSPETDEEIEKM 397
SP|Q15018|ABRX2_HUMAN GSGADLPPQRAAGDSGSDSDSYENLIDPTEPNSSEYSHSKDSRPMAPHDPPRNTQT 412
      * : : . * : : . . . : : : : : : : : : : : : : : : : : : : : : : : : : :

SP|Q6UWZ7|ABRX1_HUMAN KGFGEYSRPTF 409
SP|Q15018|ABRX2_HUMAN SQI----- 415
      . :
  
```

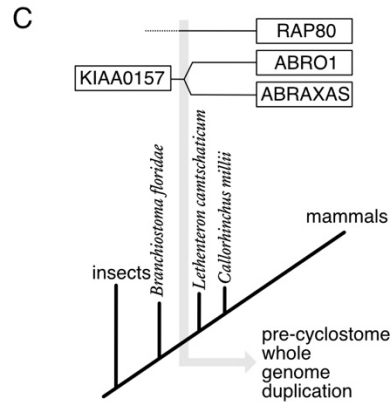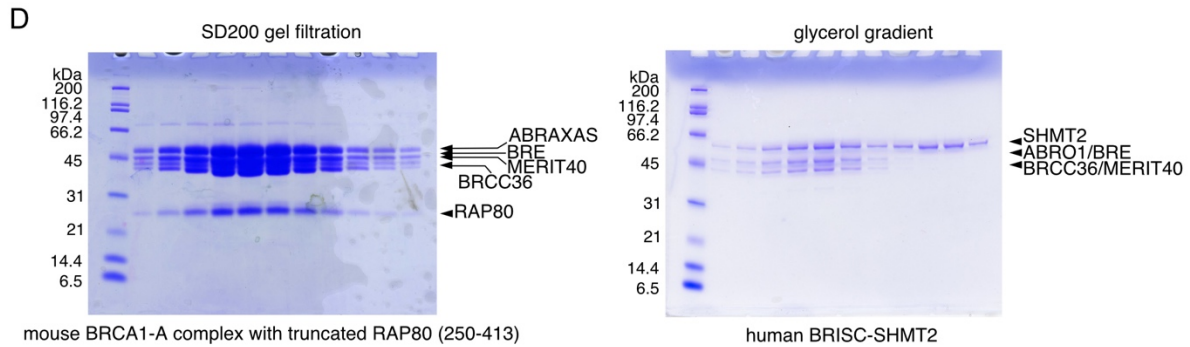

**Figure S1. Overview of protein subunits of the BRCA1-A and BRISC complexes, Related to Figure 1**

(A) Protein subunits of BRCA1-A and BRISC.

(B) Protein sequence alignment of human ABRAXAS and ABRO1.

(C) Schematic representation of the evolutionary origin of ABRAXAS and ABRO1. Up to and including the lancelet *Branchiostoma floridae* (GCA\_000003815.1) animals contain only a single ancestral precursor to ABRAXAS and ABRO1, KIAA0157, and no RAP80. The arctic lamprey *Lethenteron camtschaticum* (GCA\_000466285.1) and elephant shark *Callorhinchus milii* (GCA\_000165045.2) genomes already contain the two homologs, ABRAXAS and ABRO1, and RAP80, suggesting that they arose during the whole genome duplication preceding the development of cyclostomes (Putnam et al., 2008).

(D) SDS-PAGE analysis of mouse BRCA1-A complex size exclusion chromatography fractions used for crystallization and of human BRISC-SHMT2 $\alpha$  complex glycerol gradient fractions (higher to lower density) used for cryo-EM structure determination.

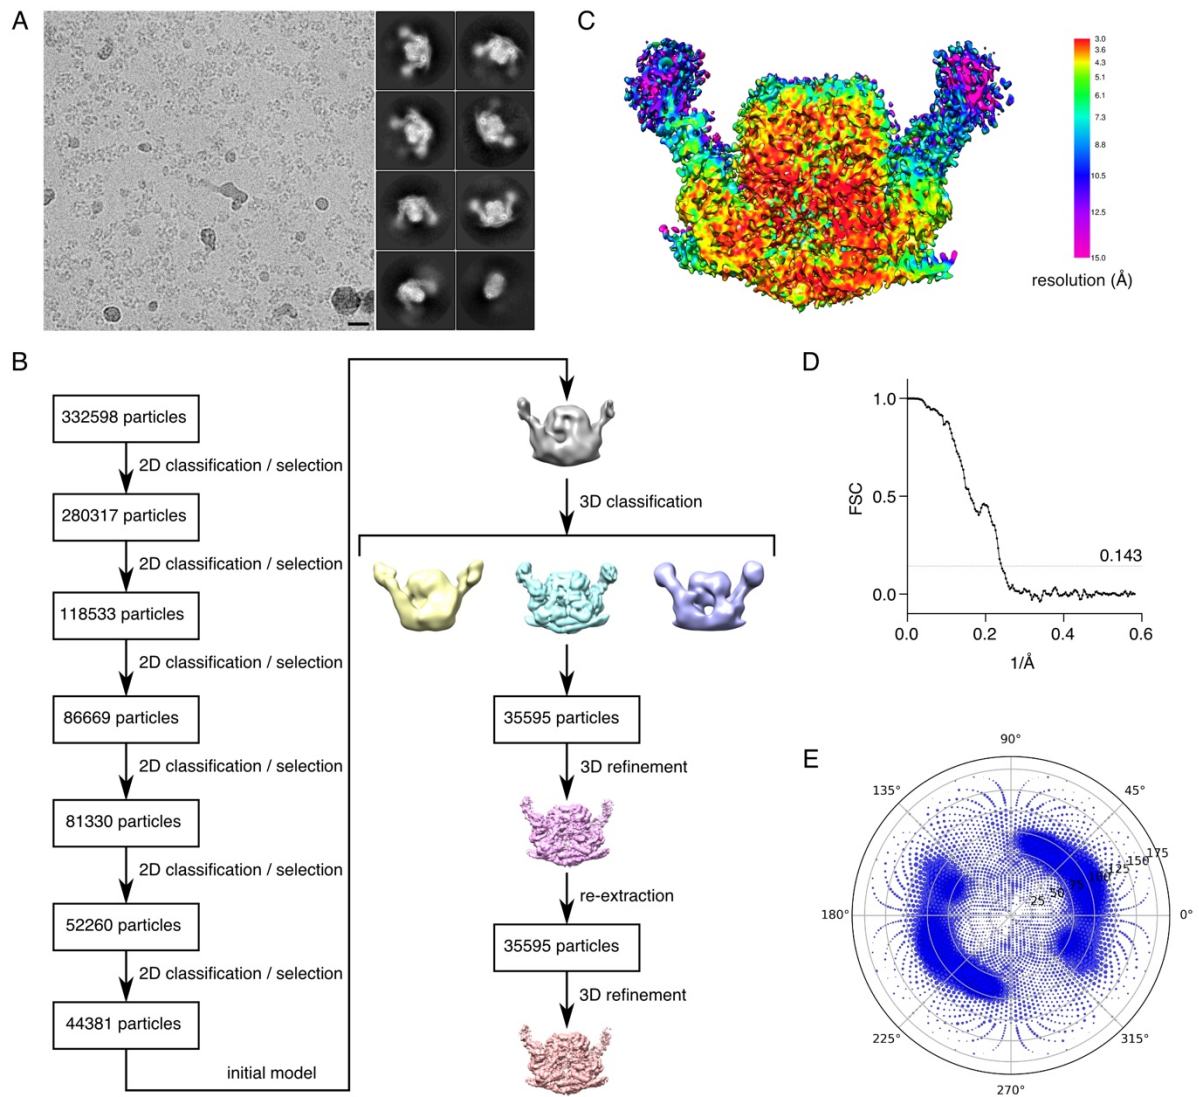

**Figure S2. Cryo-EM classification and refinement procedures for BRISC-SHMT2 $\alpha$  complex, Related to Figure 1**

(A) Representative micrograph (scale bar: 300 Å) and reference-free class averages.

(B) Flowchart representation of data processing strategy.

(D) Gold-standard Fourier shell correlation (FSC) curve.

(E) Angular distribution of particles.



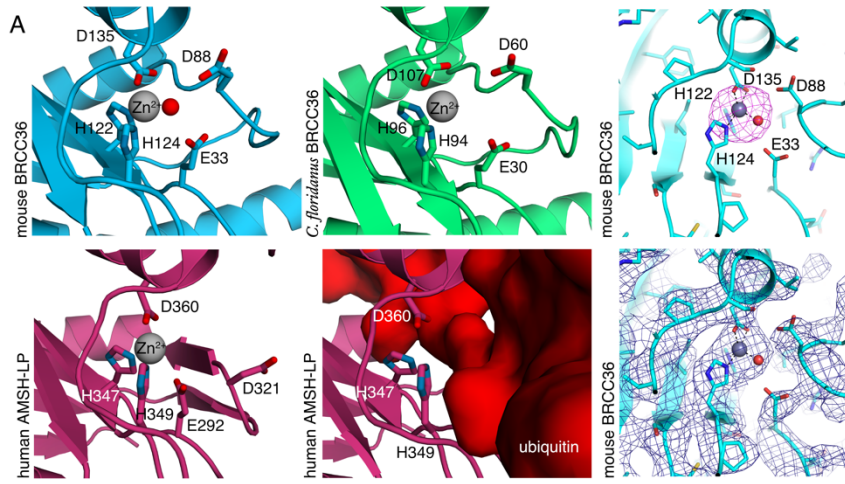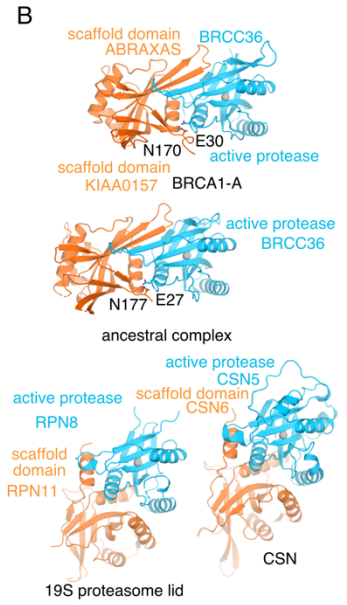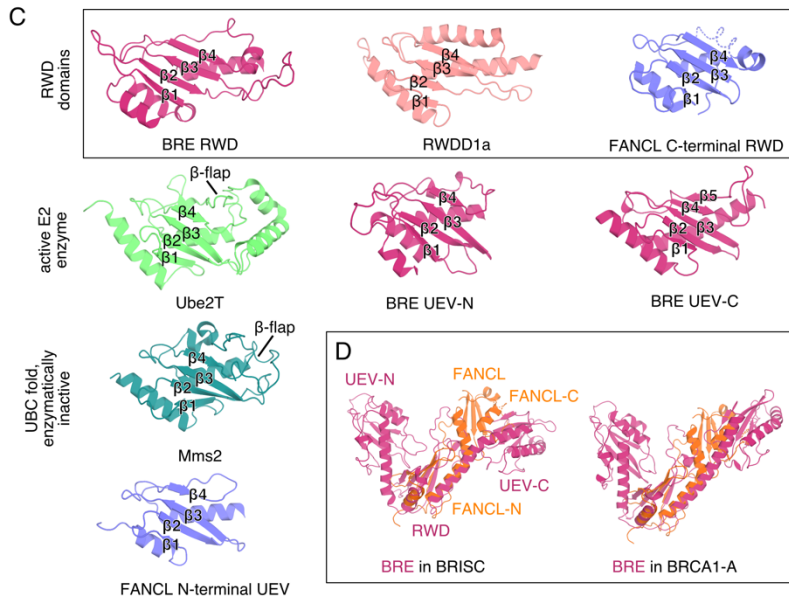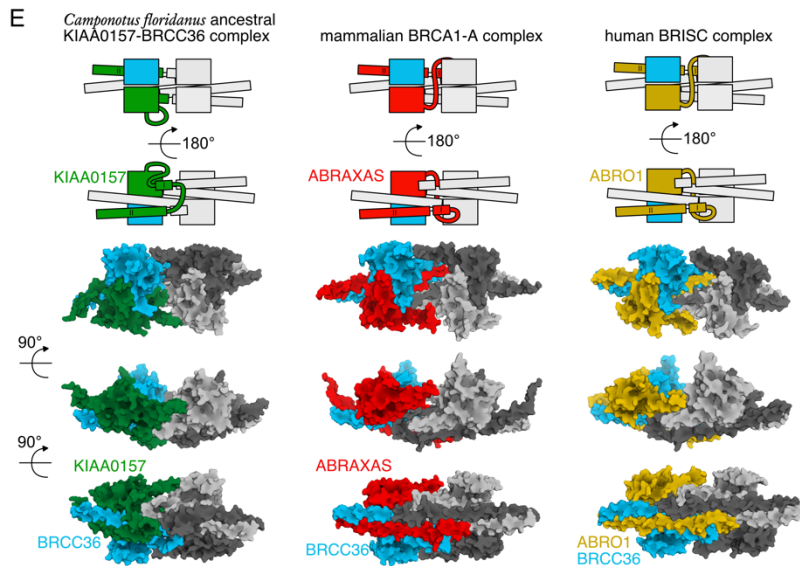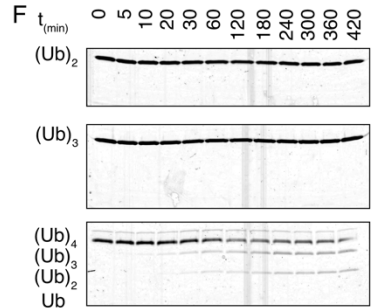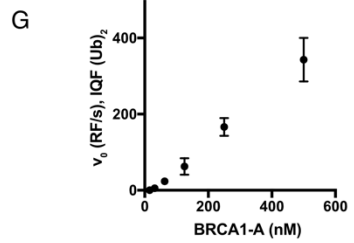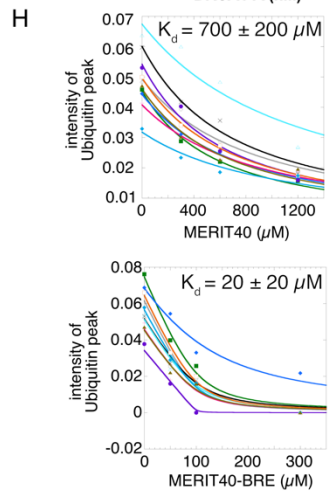

**Figure S3. Assembly of BRCA1-A and BRISC and functional aspects. Related to Figures 1 and 2**

(A) Cartoon representation of mouse BRCC36 (cyan, top left panel) active site. Residues His122, His124, and Asp135, which coordinate the active site zinc atom, and activation residue Glu33, which coordinates water in the active enzyme are highlighted. Asp88, which lies on Ins-1 adjacent to the active site, is shown. The structure of the mouse BRCC36 active site in context of the assembled complex is highly similar to the structure of ant BRCC36 in the BRCC36-KIAA0157 super-dimer (green, top center panel). Comparison to human AMSH-LP (purple, bottom left panel) shows a highly similar active site. The acidic residue Asp321 on the Ins-1 loop of AMSH-LP, which occludes access to the active site, is conserved between BRCC36 and AMSH-LP, and relocates outward upon di-ubiquitin binding (bottom center panel), suggesting a similar mechanism for BRCC36. Close-up of the BRCC36 active site in BRCA1-A showing the protein in cartoon mode (cyan) with side chains shown as sticks and active site residues labelled overlaid with an anomalous log-likelihood gain map segment showing the prominent peak for the  $Zn^{2+}$  ion (gray sphere) calculated with *REFMAC* from an intermediate data set and incomplete model is shown mesh (magenta) and contoured at 7.5 rms (top right panel). The same view as above with a segment of final  $2mF_o-DF_c$  map calculated by *REFMAC* with regularized negative B-factor sharpening ( $-160 \text{ \AA}^2$ ) shown as mesh (blue) at a contour level of 1 rms and displayed at a radius of  $15 \text{ \AA}$  about the  $Zn^{2+}$  ion (bottom right panel).

(B) Interaction between the MPN domain of the active protease and the activating MPN scaffold domain are conserved between the ancestral complex containing KIAA0157 and BRCA1-A containing ABRAXAS (and BRISC; not shown). The arrangement in BRCA1-A differs from what is observed in the 19S proteasome lid and CSN complex. Activation of BRCC36 in BRCA1-A is effected by the interaction between Asn170 of the scaffold subunit ABRAXAS with Glu30 of the activation loop of BRCC36 (residues shown as red spheres). This mechanism is found in the ancestral complex and conserved in BRISC, but sterically not possible in CSN and the proteasome lid.

(C) Structural comparison between the structures of the three UBC fold domains of BRE with the active E2 enzyme, an inactive UBC domain, an RWD domain, and the UEV and RWD domains of human FANCL suggest that the central domain of BRE adopts an RWD fold characterized by a long  $\beta$ -sheet 4 directly followed by an  $\alpha$ -helical element.

(D) Alignment of human FANCL and BRE shows that the angle between the UEV and RWD domains of FANCL is similar to the extended conformation observed in the BRE RWD and UEV-C domain.

(E) The position of the linker that connects the MPN domain of the scaffold subunit to the long, C-terminal helix II mediating dimerization differs between the ancestral KIAA0157/BRCC36 complex and the mammalian BRCA1-A and BRISC complexes. A schematic depiction follows the linker from the MPN domain to helix II. Unlike in the ancestral complex where the KIAA0157 (green) linker is positioned along the outer surface of the MPN domain, the ABRAXAS (red) linker crosses on top of the helical bundle and effectively cross-links the super-dimer in the mammalian BRCA1-A complex. In BRISC the ABRO1 (yellow) linker takes a path identical to what is observed in BRCA1-A.

(F) BRISC complex processes (Ub)<sub>4</sub> faster than (Ub)<sub>3</sub> and (Ub)<sub>2</sub>. K63-linked ubiquitin substrate (150ng/lane) is incubated with 5 nM BRISC on ice and analyzed by silver stained SDS-PAGE. Under these conditions, (Ub)<sub>4</sub> is cleaved within 5 minutes, while (Ub)<sub>2</sub> and (Ub)<sub>3</sub> are not cleaved within 7 hours.

(G) BRCA1-A is able to efficiently cleave di-Ubiquitin at higher temperature and enzyme concentration. Enzyme titration of BRCA1-A degrading 200 nM internally quenched K63-linked di-Ubiquitin shows increasing  $v_0$  (in relative fluorescence units per second) with increasing enzyme concentration. Error bars represent mean  $\pm$  SD of  $n = 3$  replicates. Since no saturation was observed using practical concentrations of fluorescent substrate, we were not able to determine the kinetic parameters.

(H) MERIT40 and the MERIT40-BRE complex bind ubiquitin. NMR binding assay by titration of MERIT40 or MERIT40-BRE into <sup>15</sup>N-labeled ubiquitin. Peak intensity for ten representative peaks in the HSQC spectrum were measured and plotted as a function of MERIT40 concentration in the titration. Peak intensity diminished as the peaks broadened from the larger molecular weight complex that is formed and/or intermediate exchange. Data were fit to a one-site binding model assuming the bound state has zero peak intensity. The reported  $K_d$  is the average affinity over tracking the ten peaks with the standard deviation reported as error.



**Figure S4. Functionalization of BRCA1-A by RAP80 and ABRAXAS, Related to Figures 2 and 3**

(A) Alignment of RAP80 from human, mouse, pig, frog, and chimaera, shows highly conserved AIR domains. The label for the conserved tryptophan residue refers to the position in the human/mouse protein.

(B) Expression of GFP-fusion RAP80 constructs (star denotes unspecific band) was controlled by western blotting with an antibody against GFP.

(C) The minimal ABRAXAS binding region observed in the structure is essential for RAP80 binding to ubiquitin *in vivo*. Wild-type and RAP80 knockout U2OS cells were transfected with either GFP-NLS, GFP-RAP80 or GFP-RAP80 $\Delta$ AIR. Cells were irradiated and focus formation was monitored by staining for MDC1 and BRCA1. The right panel shows the BRCA1 stained cells of the central panel with individual foci enlarged for comparison. BRCA1 foci were formed in wild-type cells as well as in KO cells transfected with wild-type RAP80. RAP80 devoid of the AIR domain forms RAP80 foci comparable to wild-type RAP80 but was unable to rescue BRCA1 focus formation, giving rise to fewer and smaller BRCA1 foci.

(D) Quantification shows a reduction of BRCA1 focus size by almost 50% in RAP80 KO cells that cannot be rescued by transfection with GFP-RAP80 $\Delta$ AIR. Error bars represent mean  $\pm$  SD. Number of replicates: WT n = 134, WT + RAP80 n = 56, WT + RAP80 $\Delta$ AIR n = 45, RAP80 KO n = 107, RAP80 KO + RAP80 WT n = 50, RAP80 KO + RAP80 $\Delta$ AIR n = 71.

(E) Co-expression of tagged subunits in insect cells was used to assess integration of RAP80 into BRCA1-A and BRISC. BRCA1-A integrates RAP80 stoichiometrically when co-expressed in insect cells, as shown for two independently generated sets of baculoviruses encoding BRCA1-A subunits. Co-expression of RAP80 with BRISC subunits on the other hand does not result in stoichiometric integration of RAP80 into the complex.

(F) The structure of BRISC was determined by 3D reconstruction from negative stain electron micrographs. Negative stain electron micrographs (scale bar: 150 Å), class averages, the FSC curve (18Å at FSC = 0.143) and a three-dimensional reconstruction are shown.

(G) Rigid body fitting of the BRCA1-A crystal structure into the BRISC dimer map (left) and the truncated RAP80-less BRCA1-A (Kyrieleis et al., 2016) map (right) shows that BRE and MERIT40 adopt a different conformation in fully assembled BRCA1-A with integrated RAP80 than in the two RAP80-less complexes.

(H) Negative stain electron micrograph (scale bar: 150 Å) and class averages of GraFix crosslinked BRCA1-A shows the single arc conformation only.

(I) Dimerization of BRISC is effected by an interaction between BRCC36 and BRE.

(J) Aside from the AIR domain embedded into BRCA1-A complex, RAP80 is largely flexible and unstructured as evidenced by structure prediction analysis of RAP80 sequence and by prevalence of monolinks in crosslinking-MS experiments of BRCA1-A complex.



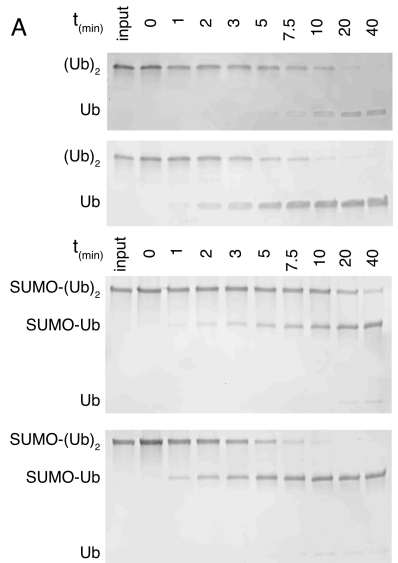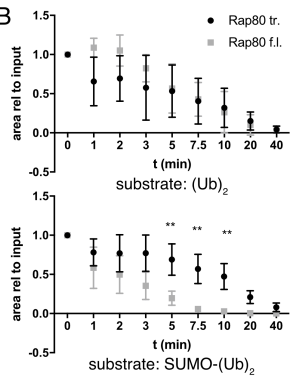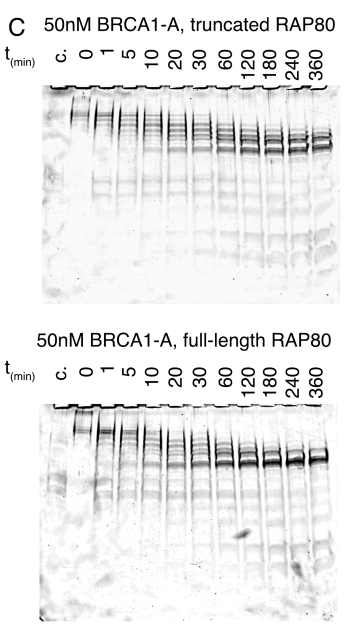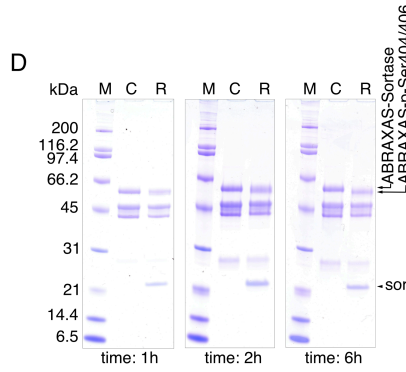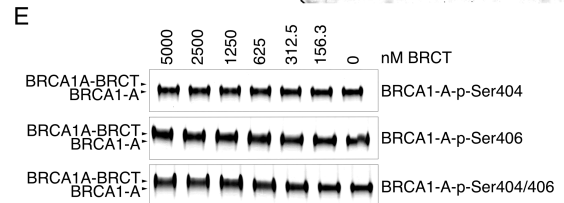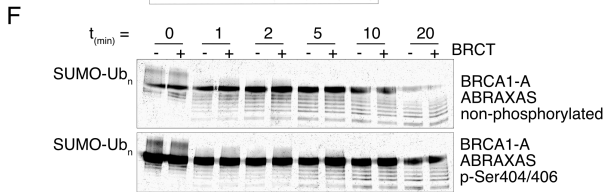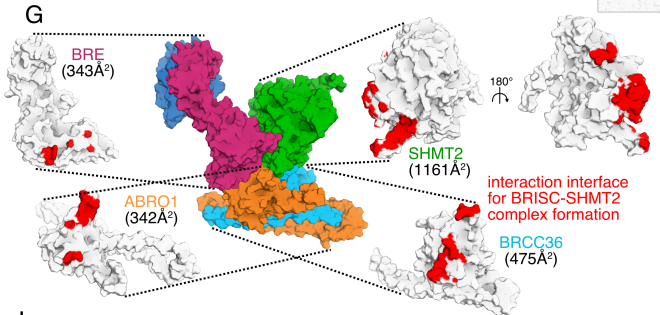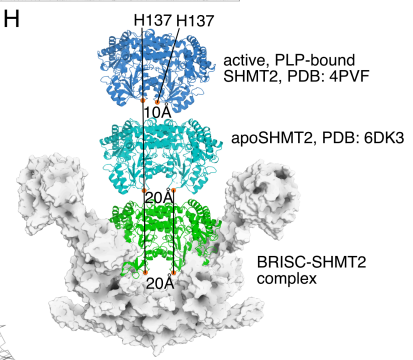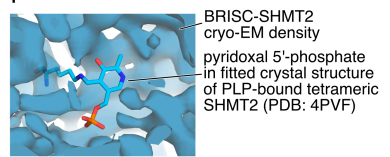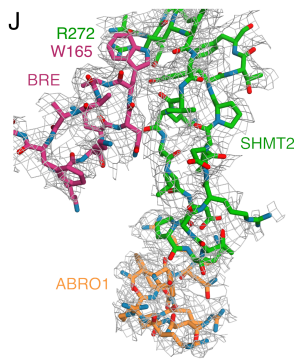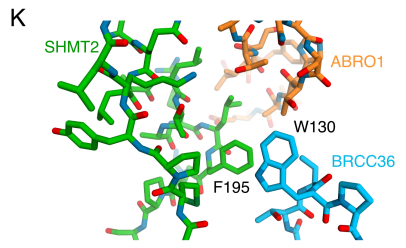

**Figure S5. BRCA1-A DUB activity, BRCA1 sequestration and BRISC-SHMT2 $\alpha$  interactions. Related to Figure 3, 4, and 5.**

(A) Specificity of BRCA1-A in degrading Ubiquitin and mixed chains was assessed using BRCA1-A with full-length or truncated RAP80 and di-Ubiquitin or SUMO-di-Ubiquitin as substrates. Deubiquitination reactions were sampled, analyzed and quantified by SYPRO Ruby staining.

(B) BRCA1-A with full-length RAP80 degrades SUMO-di-Ubiquitin faster compared to BRCA1-A complex with truncated RAP80. Degradation speed of (Ub)<sub>2</sub> is independent of the presence of the RAP80 SIM-UIM<sub>2</sub> domains. Error bars represent mean  $\pm$  SD of n = 3 replicates.

(C) Long K63-linked (SUMO)<sub>4</sub>-(Ub)<sub>n</sub> chains are rapidly degraded by BRCA1-A irrespective of the presence or absence of the RAP80 SIM-UIM<sub>2</sub> domains.

(D) Progress of the sortase labeling reaction of engineered BRCA1-A with phosphorylated C-terminal ABRAXAS peptides is shown by band shift in SDS-PAGE.

(E) BRCA1-BRCT binds BRCA1-A when ABRAXAS is phosphorylated either p-Ser404 or p-Ser404/406, but does not form larger aggregates, as evidenced by shift on native PAGE.

(F) Binding of BRCA1-BRCT does not attenuate DUB activity against long mixed SUMO-Ubiquitin chains. Timed deubiquitination reactions were analyzed by SDS-PAGE and silver stain.

(G) SHMT2 $\alpha$  binds to three subunits of BRISC: BRE, ABRO1 and BRCC36. Subunits are shown in white with the interaction surfaces shown in red.

(H) The SHMT2 $\alpha$  dimer binds BRISC in a conformation similar to the inactive, apoSHMT2 $\alpha$ , where the distance between His137 of the respective protomers is  $\sim$ 20 Å, instead of the conformation in the active, PLP-bound SHMT2 $\alpha$ , where His137 of both protomers are more proximal at  $\sim$ 10 Å distance.

(I) PLP is absent in the BRISC-SHMT2 $\alpha$  complex cryo-EM density.

(J) The SHMT2 $\alpha$  BRISC-binding loop is extending towards BRE and ABRO1. Interactions between Arg272 of SHMT2 $\alpha$  and Trp165 of BRE and between Arg153 and Tyr154 of ABRO1 and Asp279 and Pro280 of SHMT2 $\alpha$  are observed.

(K) SHMT2 $\alpha$  interacts with BRCC36: Phe195 of SHMT2 $\alpha$  binds Trp130 of BRCC36.





**Figure S6. SHMT2 $\alpha$  is an inhibitor of BRISC, related to Figures 5, 6 and 7**

(A) SHMT2 $\alpha$  binds BRISC with nanomolar affinity in a biolayer interferometry (BIF) experiment. Raw kinetic traces are shown, phase shift (nm) vs time (s);  $k_{on}$  and  $k_{off}$  were determined by global fit. SHMT2 $\alpha$  lacking the PLP cofactor (apoSHMT2) binds with the same affinity as PLP-preincubated SHMT2 $\alpha$  to BRISC in BIF. Raw kinetic traces are shown;  $k_{on}$  and  $k_{off}$  were determined by global fit. Mutation of Leu190 and Leu194 of SHMT2 $\alpha$  to lysine increases  $k_{on}$  and  $k_{off}$ , reducing the affinity of SHMT2 $\alpha$  for BRISC by an order of magnitude in BIF. Raw kinetic traces are shown;  $k_{on}$  and  $k_{off}$  were determined by global fit.

(B) SHMT2 $\alpha$  inhibits BRISC with nanomolar  $K_i$  in an internally quenched fluorescent (IQF) di-ubiquitin assay. The reaction was set up in dilution replicates ( $n = 10$ ) and  $K_i$  was determined by global fit.

(C) The Leu190Lys Leu194Lys SHMT2 $\alpha$  mutant, which binds with far lower affinity than the wild type does not inhibit BRISC in the IQF DUB assay. Error bars represent mean  $\pm$  SD of  $n = 3$  replicates.

(D) Tetrahydrofolic acid does not affect activity of BRISC or inhibition by SHMT2 $\alpha$  in the IQF DUB assay at concentrations around and above those found in human blood (Wishart et al., 2017).

(E) Serine does not affect activity of BRISC or inhibition by SHMT2 $\alpha$  in the IQF DUB assay at concentrations around and above those found inside human cells (Chaneton et al., 2012).

(F) Glycine does not affect activity of BRISC or inhibition by SHMT2 $\alpha$  in the IQF DUB assay at concentrations around and above those found inside human cells (Chaneton et al., 2012).

(G) Pyridoxal 5'-phosphate does not affect activity of BRISC or inhibition by SHMT2 $\alpha$  in the IQF DUB assay at concentrations around and above those found in human blood (Wishart et al., 2017).

(H) Schematic representation of SHMT2 N-terminus processing. The SHMT2 gene gives rise to three isoforms of the enzyme: pre-processed SHMT2, SHMT2 $\alpha$  and processed, mitochondrial SHMT2.

(I) Estimated concentrations of ABRO1 and SHMT2 for human tissues (gray rectangles) and cell lines (black circles). Estimated regions of low (green), medium (grey) and high attenuation (red) of SHMT2 function are shown. HeLa cells are shown in red. This figure assumes that inhibition kinetics of SHMT2 by BRISC is analogous to BRISC inhibition by SHMT2.

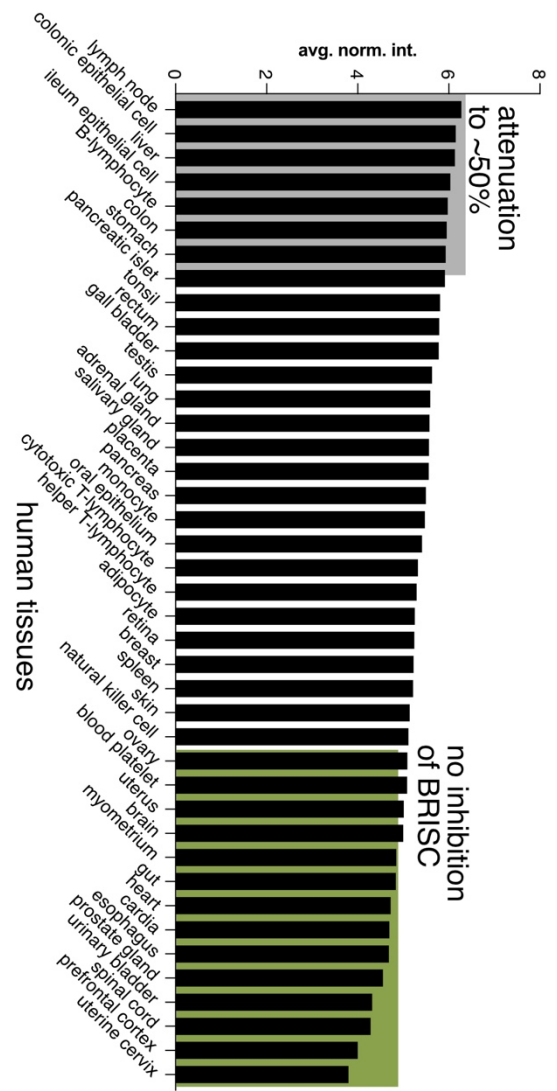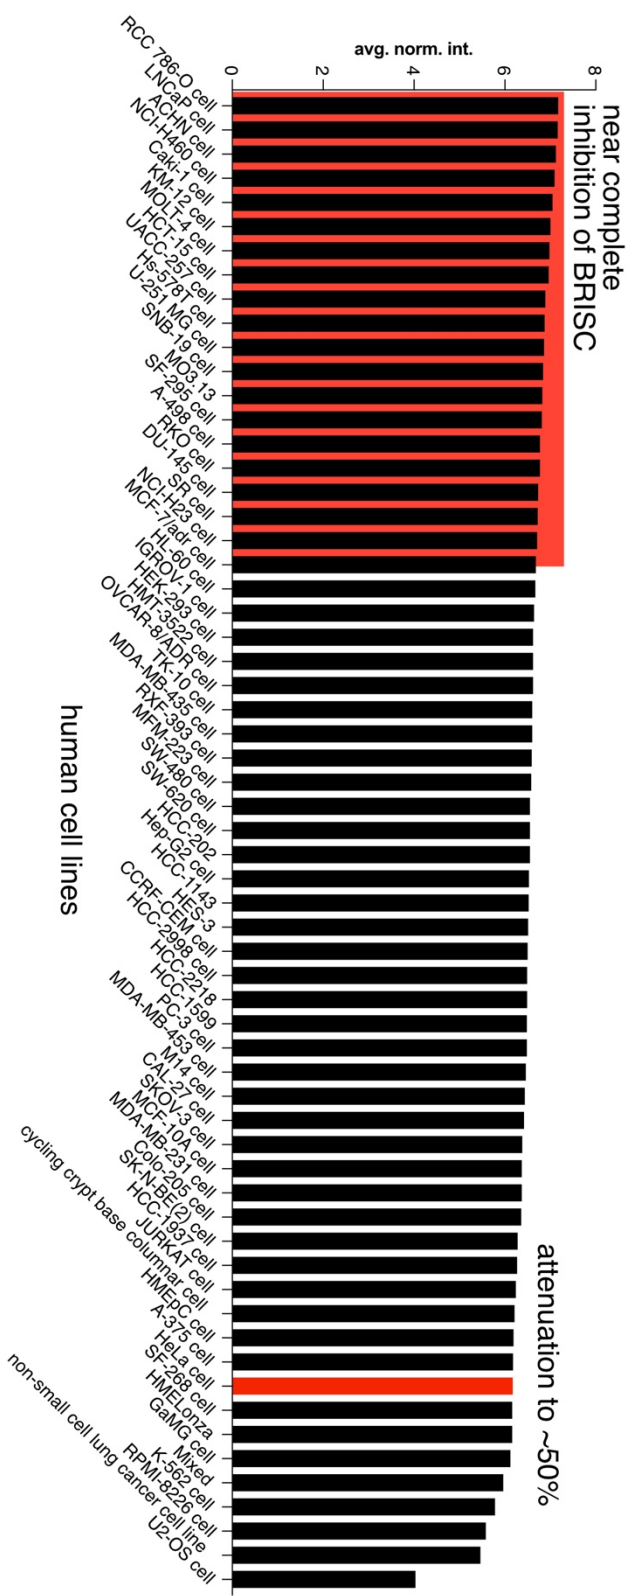

**Figure S7. SHMT2 reaches inhibitory concentrations in cancer cells, Related to Figure**

**6** The average normalized intensity for SHMT2 in the quantitative mass-spectroscopic study of Wilhelm et al., 2014 is shown for human tissues and human cell lines. The absolute concentration of SHMT2 in HeLa cells determined by Hein et al., 2015 (red bar) was used to infer the approximate absolute concentrations of SHMT2 in the other tissues and cell lines. At SHMT2 concentrations around 1  $\mu$ M and concentrations of BRISC around 50 nM, as found in HeLa cells, BRISC DUB activity is reduced by 50%. Most human tissues have lower concentrations of SHMT2, suggesting that BRISC action is attenuated in some tissues (gray), but not others (green). Cancer cell lines have far higher concentrations of SHMT2 than human tissues: most cancer cell lines surveyed contain higher concentrations of SHMT2 than HeLa, suggesting that BRISC DUB activity is nearly completely inhibited (red) in most cancer cell lines.
